# Supplementary material for: NW Adriatic Sea biogeochemical variability in the last 20 years (1986–2005)
Source: Copernicus journal article supplement (doi:10.5194/bg-4-673-2007), 2007-08-22
Supplement: Supplementary file 1 [file bg-4-673-2007-supplement.pdf]

## **Additional Electronic Material to:**

NW Adriatic Sea biogeochemical variability in the last 20 years (1986–2005)

**L. Tedesco**<sup>1,2</sup>, **G. Socal**<sup>3</sup>, **F. Bianchi**<sup>3</sup>, **F. Acri**<sup>3</sup>, **D. Veneri**<sup>3</sup>, and **M. Vichi**<sup>1,4</sup>

<sup>1</sup> Centro Euro-Mediterraneo per i Cambiamenti Climatici (CMCC), Bologna, Italy

<sup>2</sup> University of Bologna, Centro Interdipartimentale di Ricerca per le Scienze Ambientali (CIRSA), Ravenna, Italy

<sup>3</sup> CNR - ISMAR, Istituto di Scienze Marine, Venezia, Italy

<sup>4</sup> Istituto Nazionale di Geofisica e Vulcanologia, Bologna, Italy

**Correspondence to: L. Tedesco (letizia.tedesco@cmcc.it)**

**Table 1: Spearman correlations (r coefficient, p level and significance) between Po discharge and temperature and salinity at C10 and E06 (1 week time-lag).**

**Fig.1: Time series plots of the measured variables (except chl-*a*): C10, left and E06, right (nutrients, log scale).**

**Fig.2: Po river correlations with T (above) and S (below) at the surface: C10, left and E06, right.**

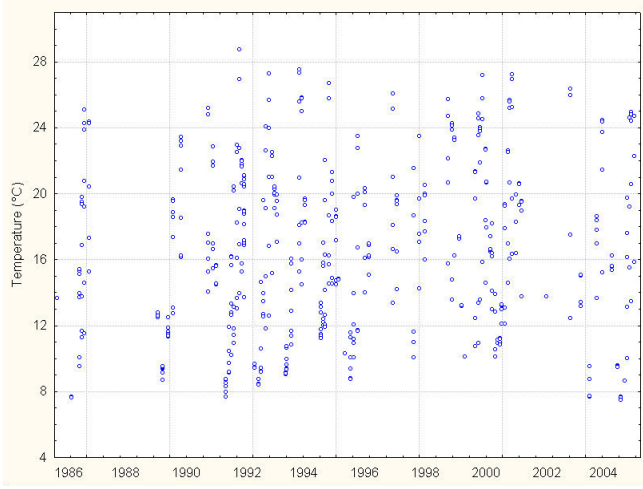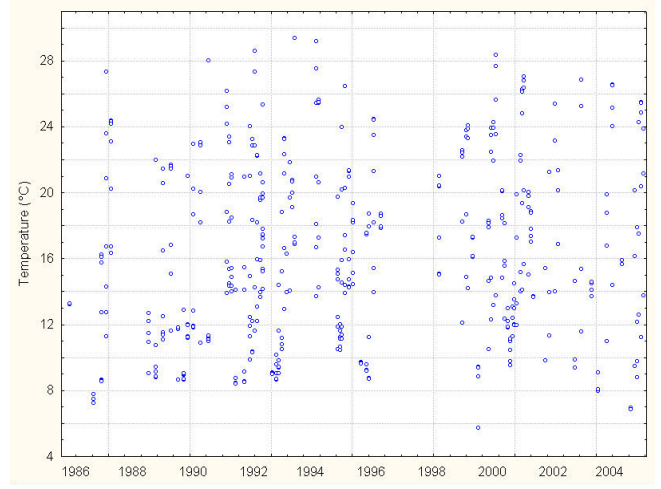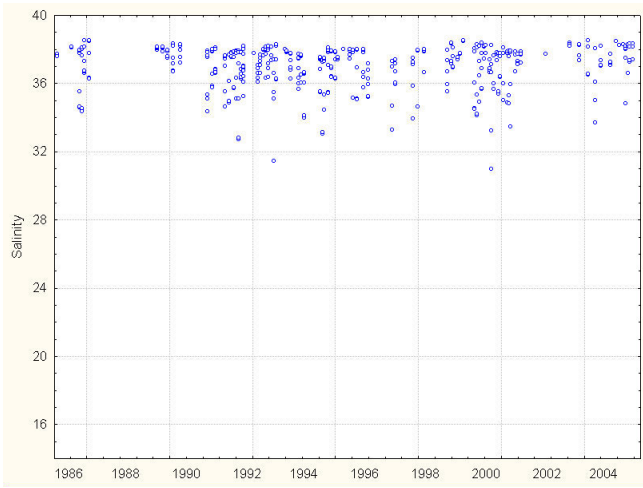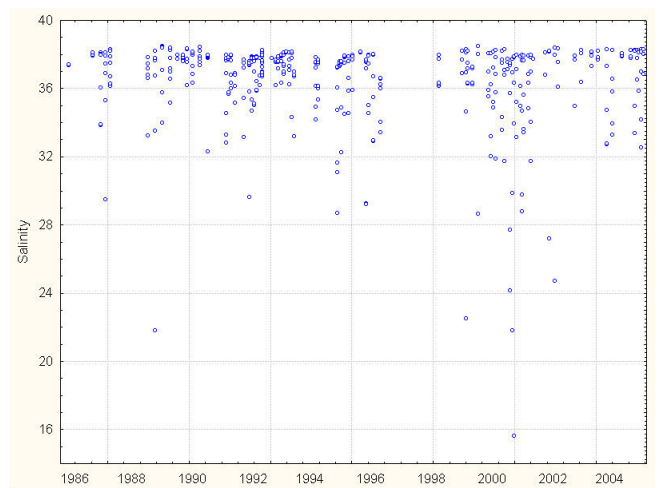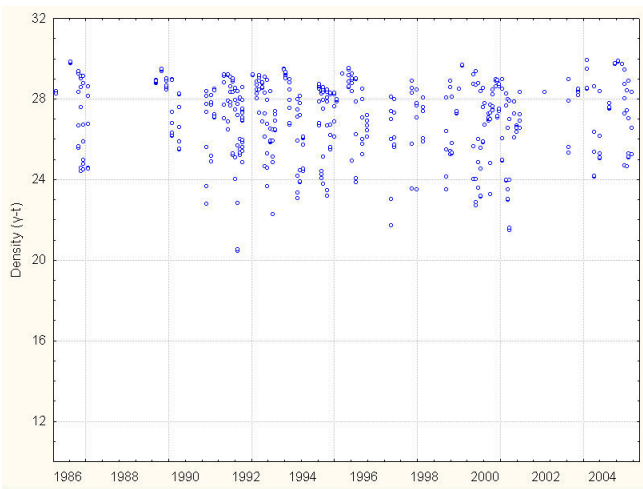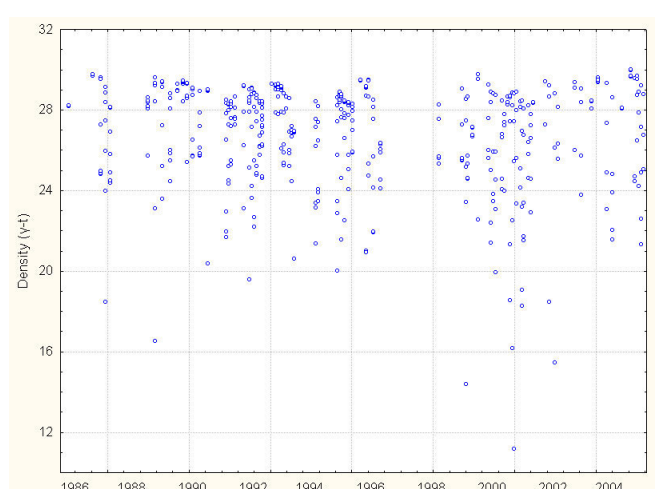

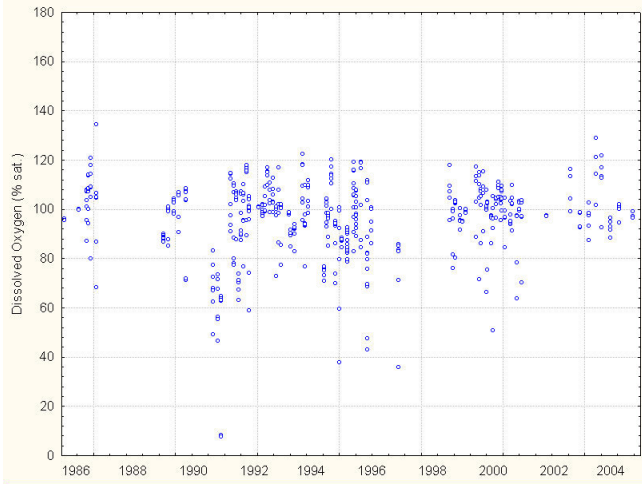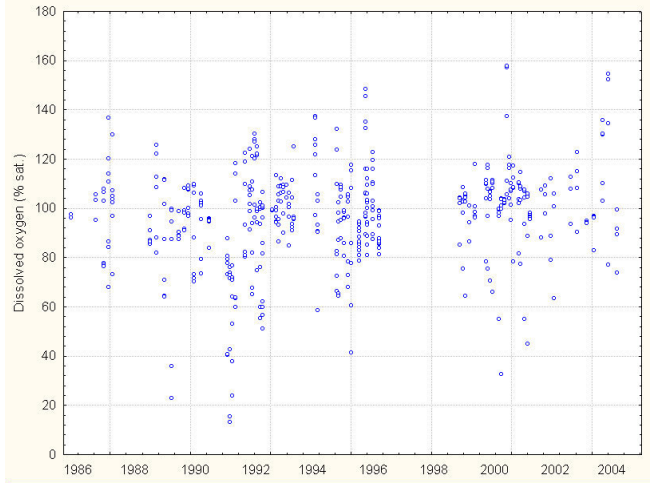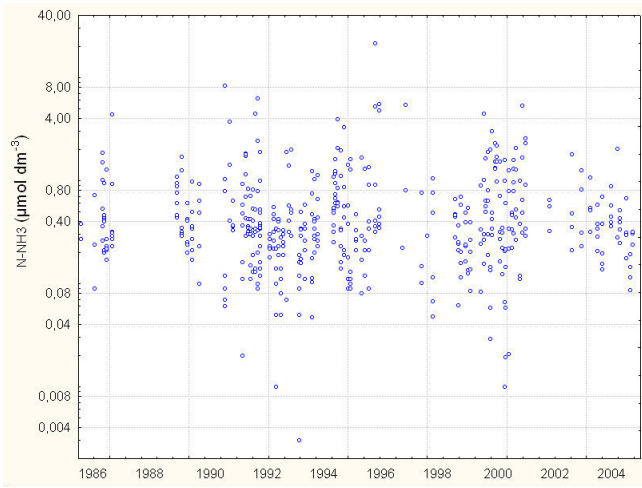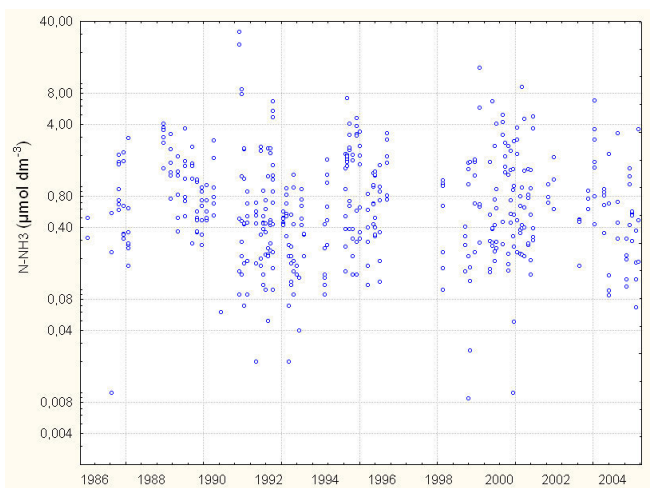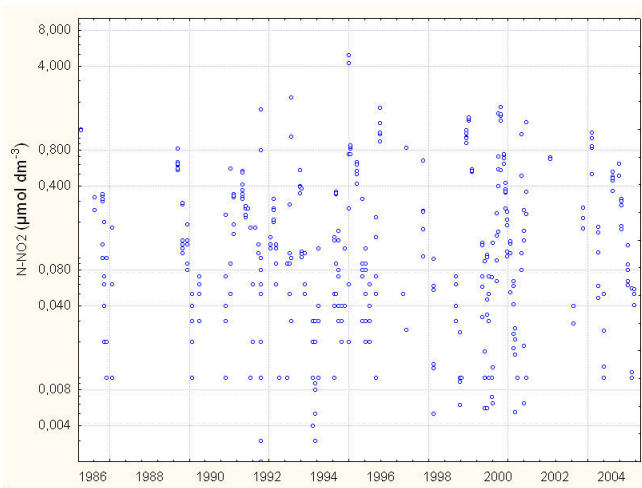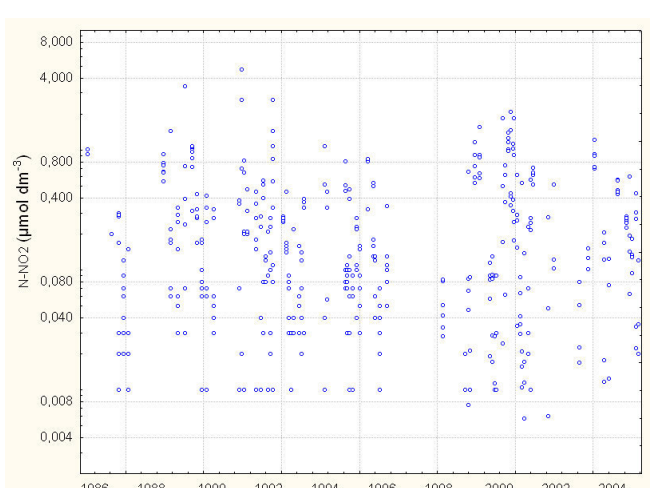

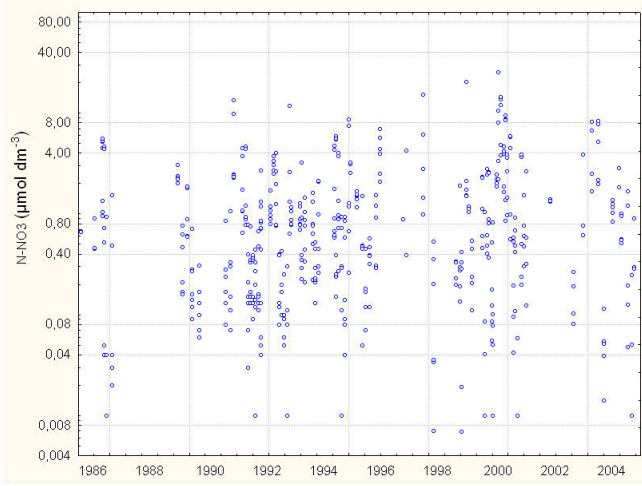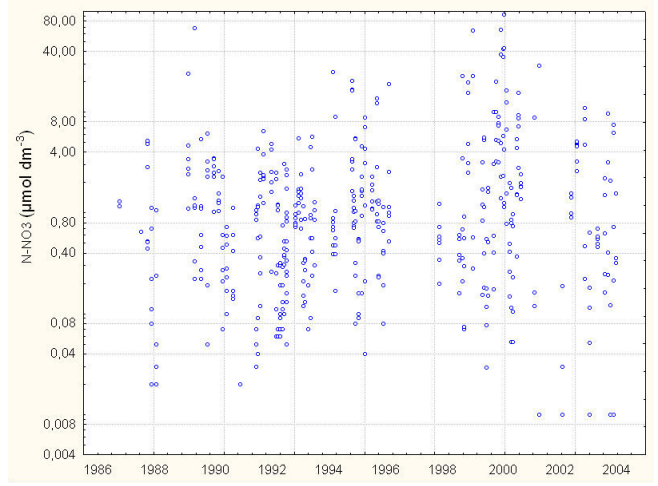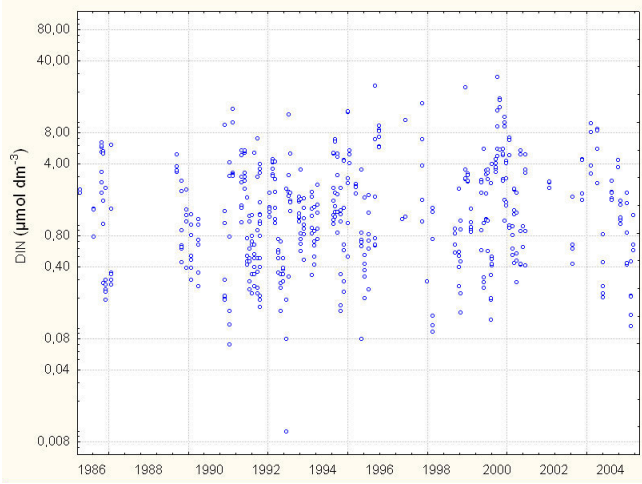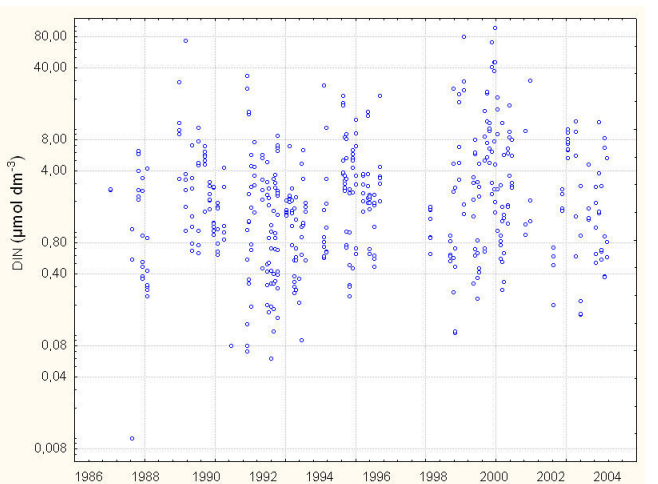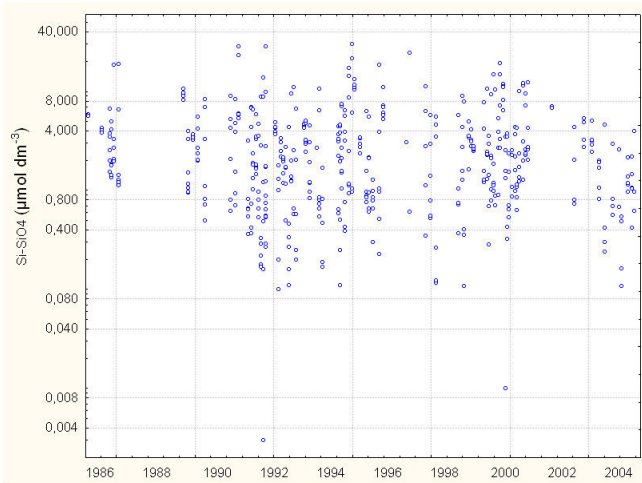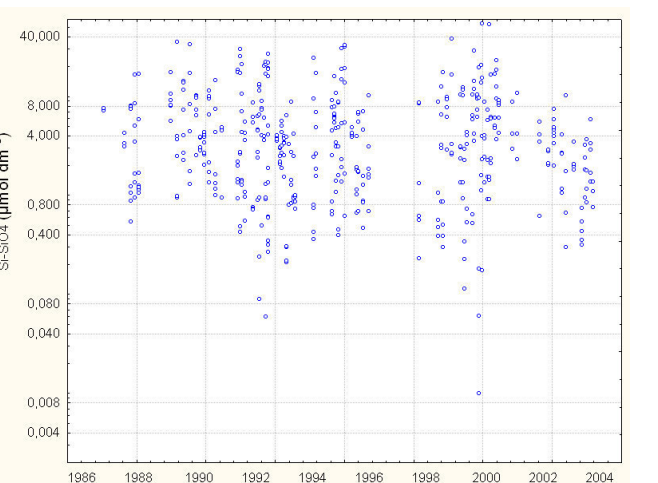

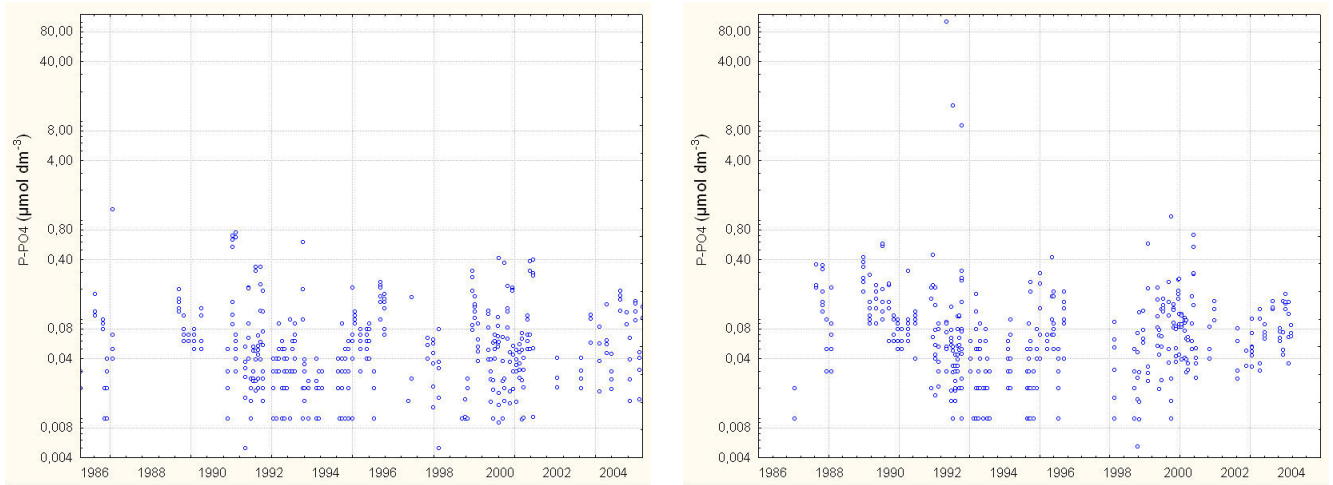

**Fig.1: Time series plots of the measured variables (except chl-*a*): C10, left and E06, right (nutrients, log scale).**

**Table 1: Spearman correlations (r coefficient, p level and significance) between Po discharge and temperature and salinity at C10 and E06 (1 week time-lag).**

|       | C10: T vs. Po | C10: S vs. Po | E06: T vs. Po | E06: S vs. Po |
|-------|---------------|---------------|---------------|---------------|
| r     | -0.363        | -0.172        | -0.251        | -0.211        |
| p     | <0.001        | 0.041         | 0.005         | 0.0186        |
| Sign. | ***           | *             | **            | *             |

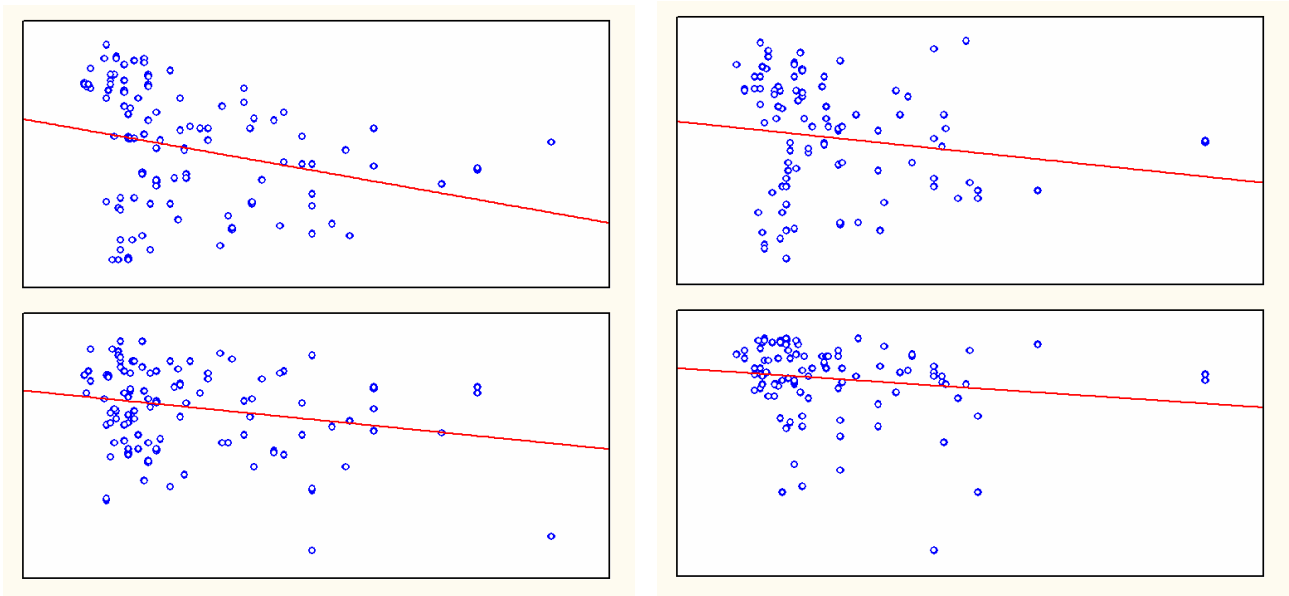

**Fig.2: Po river correlations with T (above) and S (below) at the surface: C10, left and E06, right.**
